# Supplementary material for: Systems pharmacogenomics identifies novel targets and clinically actionable therapeutics for medulloblastoma
Source: PubMed Central journal article supplement (PMC8215804; doi:10.1186/s13073-021-00920-z), 2021-06-21
Supplement: 13073_2021_920_MOESM5_ESM.pdf [file 13073_2021_920_MOESM5_ESM.pdf]

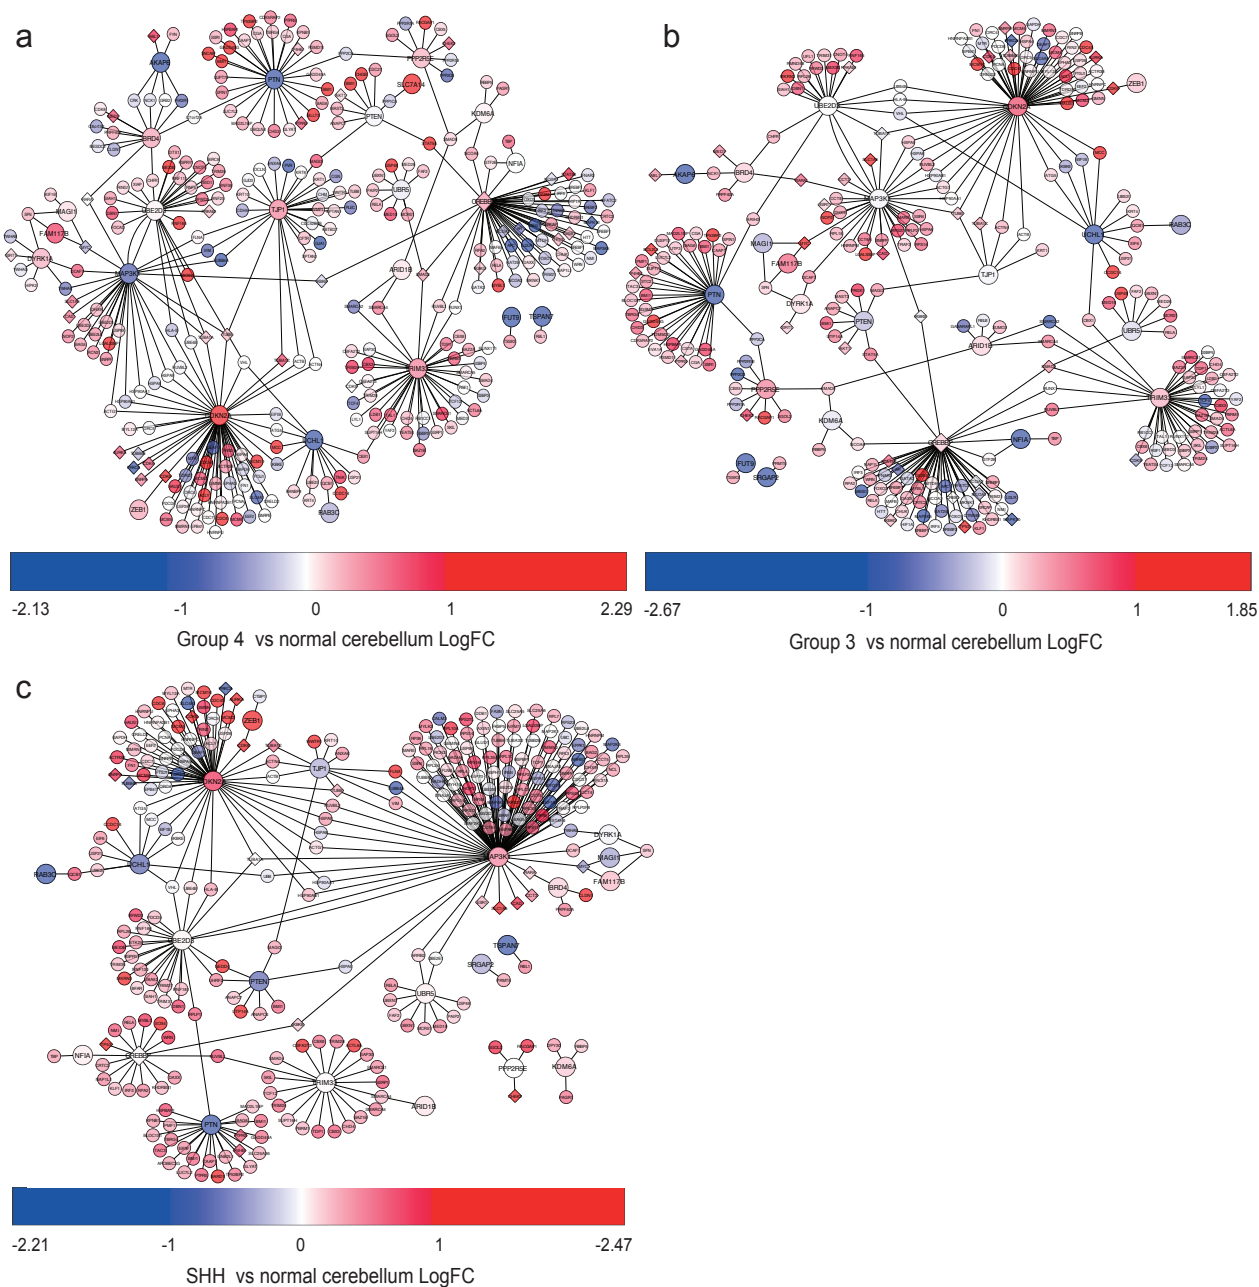

Supplementary Figure S2: Local protein interaction network representing the significantly over-expressed druggable proteins for (a) Group 4, (b) Group 3 and (c) SHH MB. CIS-derived candidate cancer genes are represented by large circles, whilst small circles represent the proteins that interact with these CI-derived candidates. Nodes coloured in red-light red represent significantly over-expressed proteins, whilst blue-light blue represent significantly under-expressed proteins of that respective subgroup.
