# Supplementary material for: Systems pharmacogenomics identifies novel targets and clinically actionable therapeutics for medulloblastoma
Source: PubMed Central journal article supplement (PMC8215804; doi:10.1186/s13073-021-00920-z), 2021-06-21
Supplement: 13073_2021_920_MOESM6_ESM.pdf [file 13073_2021_920_MOESM6_ESM.pdf]

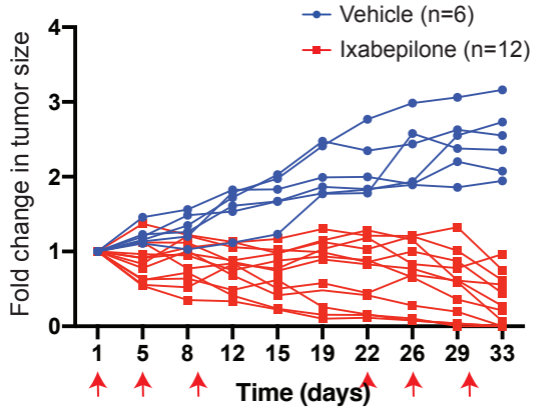

Supplementary Figure S3: Ixabepilone causes regression of sonic hedgehog (SHH) MB. Fold change in tumour volume following treatment with ixabepilone or vehicle in mice bearing Med-1712FH SHH subcutaneous tumours. Tumour measurements were compared between vehicle and drug treatments using linear mixed models analysis in R. Treatment days are indicated by a red arrow on each graph.
